# Supplementary material for: Causal effect of alcohol use on the risk of end-stage kidney disease and related comorbidities: a Mendelian randomization study
Source: PubMed Central journal article supplement — Kidney Res Clin Pract. 2021 Apr 20;40(2):282–93. doi: 10.23876/j.krcp.20.186 (PMC8237113; doi:10.23876/j.krcp.20.186), 2021-04-20
Supplement: j-krcp-20-186suppl2.pdf [file j-krcp-20-186suppl2.pdf]

**Supplemental Table 1.** Genetic instrument for chronic kidney disease stage  $\geq 3$  phenotype

| Chromosome | Position  | SNP                 | Gene             | Minor allele | Other allele | Beta     | standard error | p-value  |
|------------|-----------|---------------------|------------------|--------------|--------------|----------|----------------|----------|
| 1          | 243464416 | rs2636321           | <i>SDCCAG8</i>   | A            | G            | 0.090773 | 0.016491       | 3.70E-08 |
| 2          | 73691144  | rs9678093           | <i>ALMS1</i>     | C            | A            | -0.10081 | 0.017078       | 3.57E-09 |
| 2          | 73800881  | rs758884626         | <i>ALMS1</i>     | G            | GT           | -0.0944  | 0.017193       | 4.01E-08 |
| 2          | 73834035  | rs4852308           | <i>ALMS1</i>     | T            | G            | -0.09382 | 0.017201       | 4.92E-08 |
| 2          | 73934095  | rs560203661         | -                | G            | GA           | -0.10024 | 0.01761        | 1.25E-08 |
| 4          | 77373079  | rs2870238           | <i>SHROOM3</i>   | C            | T            | -0.10615 | 0.016497       | 1.24E-10 |
| 5          | 697380    | rs56139727          | <i>TPPP</i>      | G            | T            | 0.117045 | 0.019558       | 2.17E-09 |
| 5          | 176794191 | rs12654812          | <i>RGS14</i>     | A            | G            | 0.101139 | 0.017068       | 3.11E-09 |
| 7          | 1281064   | rs12702509          | <i>UNCX</i>      | G            | A            | -0.10745 | 0.019558       | 3.93E-08 |
| 7          | 151415746 | 7:151415746_GT_G    | <i>WDR86-AS1</i> | G            | GT           | 0.10696  | 0.017587       | 1.19E-09 |
| 11         | 30757133  | 11:30757133_CAAAT_C | C                | CAAAT        | 0.090371     | 0.016505 | 4.37E-08       |          |
| 11         | 30777014  | rs34830202          |                  | GA           | G            | -0.09653 | 0.016649       | 6.71E-09 |
| 11         | 65493191  | rs4930159           | <i>RNASEH2C</i>  | T            | G            | 0.095528 | 0.016506       | 7.15E-09 |
| 15         | 45650360  | 15:45650360_CT_C    | <i>SQOR</i>      | C            | CT           | 0.105908 | 0.018382       | 8.32E-09 |
| 15         | 45682277  | rs1145078           | <i>GATM</i>      | T            | C            | 0.101627 | 0.018447       | 3.60E-08 |
| 16         | 20408529  | rs66891425          | <i>PDILT</i>     | G            | A            | -0.12304 | 0.016973       | 4.19E-13 |
| 17         | 19474875  | rs111653425         | <i>SLC47A1</i>   | T            | C            | 0.356842 | 0.06479        | 3.63E-08 |
