# Supplementary material for: Causal effect of alcohol use on the risk of end-stage kidney disease and related comorbidities: a Mendelian randomization study
Source: PubMed Central journal article supplement — Kidney Res Clin Pract. 2021 Apr 20;40(2):282–93. doi: 10.23876/j.krcp.20.186 (PMC8237113; doi:10.23876/j.krcp.20.186), 2021-04-20
Supplement: j-krcp-20-186suppl3.pdf [file j-krcp-20-186suppl3.pdf]

**Supplemental Table 2.** GWAS results for chronic kidney disease stage  $\geq 3$  phenotype of the genetic instrument for amounts of alcohol use

| Chr | Position  | SNP               | Gene                                         | Minor allele            | Other allele | Minor allele frequency | Beta    | Standard error | p-value |
|-----|-----------|-------------------|----------------------------------------------|-------------------------|--------------|------------------------|---------|----------------|---------|
| 1   | 8078805   | rs571188732       | <i>ERRFI1</i>                                | T                       | C            | 0.0018                 | 0.2356  | 0.2319         | 0.310   |
| 2   | 27739880  | 2:27739880_CT_C   | -                                            | CT                      | C            | 0.4966                 | -0.0455 | 0.0169         | 0.007   |
| 2   | 45138325  | rs539447          | -                                            | A                       | G            | 0.4943                 | -0.0144 | 0.0165         | 0.380   |
| 2   | 45207824  | rs503435          | -                                            | A                       | G            | 0.4914                 | 0.0231  | 0.0165         | 0.160   |
| 4   | 39368083  | rs3736168         | <i>RFC1</i>                                  | C                       | T            | 0.4887                 | -0.0088 | 0.0165         | 0.594   |
| 4   | 39426395  | rs151010045       | <i>KLB</i>                                   | C                       | T            | 0.0330                 | -0.0269 | 0.0473         | 0.570   |
| 4   | 99691047  | rs71612659        | -                                            | A                       | G            | 0.0581                 | -0.0859 | 0.0378         | 0.023   |
| 4   | 99973122  | 4:99973122_AATG_A | <i>HZAZ1-DT</i>                              | A                       | AATG         | 0.0025                 | 0.0258  | 0.2298         | 0.911   |
| 4   | 100239319 | rs1229984         | <i>ADH1B</i>                                 | T                       | C            | 0.0224                 | 0.0373  | 0.0540         | 0.490   |
| 4   | 100270452 | rs13125415        | <i>ADH1C</i>                                 | G                       | A            | 0.4227                 | 0.0261  | 0.0166         | 0.116   |
| 4   | 100284882 | 4:100284882_AT_A  | -                                            | A                       | AT           | 0.0622                 | -0.0131 | 0.0342         | 0.701   |
| 4   | 100313619 | rs574536742       | -                                            | A                       | C            | 0.0011                 | 0.0754  | 0.3876         | 0.846   |
| 4   | 100401757 | rs148500703       | <i>AP001960.1</i>                            | TAATT<br>TTGTC          | T 0.0193     | -0.0403                | 0.0612  | 0.511          |         |
| 4   | 103198082 | rs13135092        | <i>SLC39A8</i>                               | G                       | A            | 0.0831                 | 0.0164  | 0.0297         | 0.579   |
| 7   | 73042085  | rs62466318        | <i>MLXIPL</i>                                | T                       | C            | 0.2045                 | -0.0117 | 0.0205         | 0.569   |
| 7   | 103906175 | rs185752293       | -                                            | G                       | T            | 0.0012                 | 0.2093  | 0.4160         | 0.615   |
| 8   | 30013792  | rs562181077       | <i>DCTN6</i>                                 | C                       | A            | 0.0014                 | 0.1895  | 0.2575         | 0.462   |
| 9   | 12412669  | rs796759482       | -                                            | GTATATATAT<br>ATATATATA | G 0.4857     | 0.0185                 | 0.0167  | 0.267          |         |
| 9   | 80061902  | rs537067378       | <i>GNA14</i>                                 | T                       | C            | 0.0014                 | -0.1915 | 0.2538         | 0.451   |
| 10  | 57856312  | rs187661602       | -                                            | G                       | T            | 0.0011                 | -0.6217 | 0.4956         | 0.210   |
| 11  | 47676170  | rs7107356         | <i>AGBL2</i>                                 | A                       | G            | 0.4944                 | -0.0451 | 0.0164         | 0.006   |
| 11  | 113413565 | rs10891570        | -                                            | A                       | G            | 0.3984                 | 0.0043  | 0.0169         | 0.801   |
| 11  | 116013220 | rs561117150       | -                                            | A                       | G            | 0.0016                 | -0.0763 | 0.2149         | 0.723   |
| 11  | 121522709 | rs612409          | -                                            | G                       | A            | 0.4987                 | -0.0018 | 0.0165         | 0.912   |
| 15  | 74667953  | rs35807116        | <i>AC090826.2</i>                            | C                       | T            | 0.3941                 | 0.0332  | 0.0168         | 0.048   |
| 16  | 69720964  | rs3169315         | <i>NFAT5</i>                                 | A                       | G            | 0.1868                 | 0.0057  | 0.0211         | 0.785   |
| 17  | 43498316  | rs539386657       | <i>ARHGAP27</i>                              | C                       | CA           | 0.4292                 | -0.0093 | 0.0176         | 0.595   |
| 17  | 43660196  | rs2668683         | <i>DND1P1</i>                                | A                       | G            | 0.4994                 | 0.0046  | 0.0190         | 0.807   |
| 17  | 43857292  | rs35111772        | <i>CRHR1</i>                                 | CTTTTTTT                | C            | 0.4683                 | 0.0148  | 0.0171         | 0.387   |
| 17  | 43934256  | rs2316770         | <i>MAPT-AS1</i>                              | A                       | G            | 0.4418                 | 0.0063  | 0.0168         | 0.708   |
| 17  | 44353261  | rs55885927        | ARL17B C T<br>0.0325 -0.0699 0.0664<br>0.293 |                         |              |                        |         |                |         |
| 17  | 44573874  | rs75104997        | -                                            | G                       | C            | 0.4955                 | 0.0105  | 0.0187         | 0.574   |
| 17  | 44874453  | rs1563304         | <i>WNT3</i>                                  | T                       | C            | 0.1807                 | 0.0264  | 0.0213         | 0.214   |
| 18  | 32091959  | rs571604652       | <i>DTNA</i>                                  | G                       | C            | 0.0045                 | -0.0442 | 0.1313         | 0.736   |
| 18  | 41237960  | rs185843056       | -                                            | A                       | G            | 0.0010                 | 0.2247  | 0.3673         | 0.541   |

GWAS, genome-wide association study.
