# Supplementary material for: Causal effect of alcohol use on the risk of end-stage kidney disease and related comorbidities: a Mendelian randomization study
Source: PubMed Central journal article supplement — Kidney Res Clin Pract. 2021 Apr 20;40(2):282–93. doi: 10.23876/j.krcp.20.186 (PMC8237113; doi:10.23876/j.krcp.20.186), 2021-04-20
Supplement: j-krcp-20-186suppl4.pdf [file j-krcp-20-186suppl4.pdf]

**Supplemental Table 3. GWAS results for end-stage kidney disease phenotype of the genetic instrument for amounts of alcohol use**

| Chr | Position  | SNP               | Gene              | Minor allele            | Other allele | Minor allele frequency | Beta    | Standard error | p-value |
|-----|-----------|-------------------|-------------------|-------------------------|--------------|------------------------|---------|----------------|---------|
| 1   | 8078805   | rs571188732       | <i>ERRFI1</i>     | T                       | C            | 0.0018                 | 0.2131  | 1.2375         | 0.463   |
| 2   | 27739880  | 2:27739880_CT_C   | -                 | CT                      | C            | 0.4966                 | -2.8604 | 0.0572         | 0.139   |
| 2   | 45138325  | rs539447          | -                 | A                       | G            | 0.4943                 | -2.8855 | 0.0558         | 0.705   |
| 2   | 45207824  | rs503435          | -                 | A                       | G            | 0.4914                 | -2.8847 | 0.0559         | 0.423   |
| 4   | 39368083  | rs3736168         | <i>RFC1</i>       | C                       | T            | 0.4887                 | -2.8762 | 0.0563         | 0.002   |
| 4   | 39426395  | rs151010045       | <i>KLB</i>        | C                       | T            | 0.0330                 | -1.8326 | 0.1600         | 0.878   |
| 4   | 99691047  | rs71612659        | -                 | A                       | G            | 0.0581                 | -2.1590 | 0.1154         | 0.124   |
| 4   | 99973122  | 4:99973122_AATG_A | <i>HZAZ1-DT</i>   | A                       | AATG         | 0.0025                 | 0.4197  | 1.5215         | 0.161   |
| 4   | 100239319 | rs1229984         | <i>ADH1B</i>      | T                       | C            | 0.0224                 | -1.5561 | 0.2110         | 0.255   |
| 4   | 100270452 | rs13125415        | <i>ADH1C</i>      | G                       | A            | 0.4227                 | -2.8802 | 0.0561         | 0.025   |
| 4   | 100284882 | 4:100284882_AT_A  | -                 | A                       | AT           | 0.0622                 | -2.0921 | 0.1234         | 0.227   |
| 4   | 100313619 | rs574536742       | -                 | A                       | C            | 0.0011                 | 0.5540  | 1.7402         | 0.652   |
| 4   | 100401757 | rs148500703       | <i>AP001960.1</i> | TAATT<br>TTGTC          | T            | 0.0193                 | -1.4103 | 0.2441         | 0.134   |
| 4   | 103198082 | rs13135092        | <i>SLC39A8</i>    | G                       | A            | 0.0831                 | -2.2794 | 0.1023         | 0.758   |
| 7   | 73042085  | rs62466318        | <i>MLXIPL</i>     | T                       | C            | 0.2045                 | -2.6666 | 0.0695         | 0.896   |
| 7   | 103906175 | rs185752293       | -                 | G                       | T            | 0.0012                 | 0.1254  | 1.1336         | 0.487   |
| 8   | 30013792  | rs562181077       | <i>DCTN6</i>      | C                       | A            | 0.0014                 | NA      | NA             | NA      |
| 9   | 12412669  | rs796759482       | -                 | GTATATATAT<br>ATATATATA | G            | 0.4857                 | -2.8700 | 0.0567         | 0.117   |
| 9   | 80061902  | rs537067378       | <i>GNA14</i>      | T                       | C            | 0.0014                 | -0.4919 | 0.6115         | 0.334   |
| 10  | 57856312  | rs187661602       | -                 | G                       | T            | 0.0011                 | 0.6806  | 1.9751         | 0.593   |
| 11  | 47676170  | rs7107356         | <i>AGBL2</i>      | A                       | G            | 0.4944                 | -2.8880 | 0.0557         | 0.691   |
| 11  | 113413565 | rs10891570        | -                 | A                       | G            | 0.3984                 | -2.8588 | 0.0573         | 0.840   |
| 11  | 116013220 | rs561117150       | -                 | A                       | G            | 0.0016                 | -0.7784 | 0.4592         | 0.046   |
| 11  | 121522709 | rs612409          | -                 | G                       | A            | 0.4987                 | -2.8808 | 0.0561         | 0.676   |
| 15  | 74667953  | rs35807116        | <i>AC090826.2</i> | C                       | T            | 0.3941                 | -2.8622 | 0.0571         | 0.776   |
| 16  | 69720964  | rs3169315         | <i>NFAT5</i>      | A                       | G            | 0.1868                 | -2.6434 | 0.0711         | 0.810   |
| 17  | 43498316  | rs539386657       | <i>ARHGAP27</i>   | C                       | CA           | 0.4292                 | -2.8218 | 0.0595         | 0.759   |
| 17  | 43660196  | rs2668683         | <i>DND1P1</i>     | A                       | G            | 0.4994                 | -2.7405 | 0.0645         | 0.012   |
| 17  | 43857292  | rs35111772        | <i>CRHR1</i>      | CTTTTTTT                | C            | 0.4683                 | -2.8480 | 0.0580         | 0.789   |
| 17  | 43934256  | rs2316770         | <i>MAPT-AS1</i>   | A                       | G            | 0.4418                 | -2.8669 | 0.0569         | 0.066   |
| 17  | 44353261  | rs55885927        | <i>ARL17B</i>     | C                       | T            | 0.0325                 | -1.4178 | 0.2422         | 0.217   |
| 17  | 44573874  | rs75104997        | -                 | G                       | C            | 0.4955                 | -2.7594 | 0.0633         | 0.437   |
| 17  | 44874453  | rs1563304         | <i>WNT3</i>       | T                       | C            | 0.1807                 | -2.6339 | 0.0718         | 0.566   |
| 18  | 32091959  | rs571604652       | <i>DTNA</i>       | G                       | C            | 0.0045                 | -0.9939 | 0.3701         | 0.380   |
| 18  | 41237960  | rs185843056       | -                 | A                       | G            | 0.0010                 | -0.0940 | 0.9103         | 0.272   |

The effect size of rs562181077 was not reported, as no ESKD phenotype was present in individuals with one of the alleles.

Chr, chromosome; GWAS, genome-wide association study; SNP, single nucleotide polymorphism.
