# Supplementary material for: Causal effect of alcohol use on the risk of end-stage kidney disease and related comorbidities: a Mendelian randomization study
Source: PubMed Central journal article supplement — Kidney Res Clin Pract. 2021 Apr 20;40(2):282–93. doi: 10.23876/j.krcp.20.186 (PMC8237113; doi:10.23876/j.krcp.20.186), 2021-04-20
Supplement: j-krcp-20-186suppl5.pdf [file j-krcp-20-186suppl5.pdf]

**Supplemental Table 4.** The results for the association between PRS for alcohol intake amount and the risk of CKD or ESKD in those with low ( $\leq 7$  drinks per week) phenotypical amount of alcohol use

| Outcome | OR (95% CI)         | p-value |
|---------|---------------------|---------|
| ESKD    | 1.044 (0.825–0.321) | 0.722   |
| CKD     | 1.043 (0.976–1.115) | 0.212   |

CI, confidence interval; CKD, chronic kidney disease; ESKD, end-stage kidney disease; OR, odds ratio; PRS, polygenic risk score.
